# Supplementary material for: circRNF10 Regulates Tumorigenic Properties and Natural Killer Cell-Mediated Cytotoxicity against Breast Cancer through the miR-934/PTEN/PI3k-Akt Axis
Source: MDPI journal article supplement (doi:10.3390/cancers14235862), 2022-11-28
Supplement: s1 [file s1]

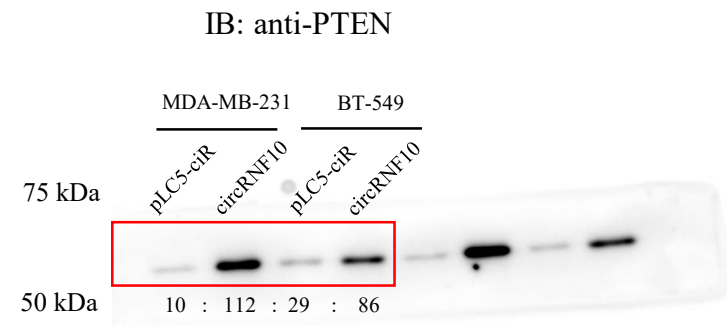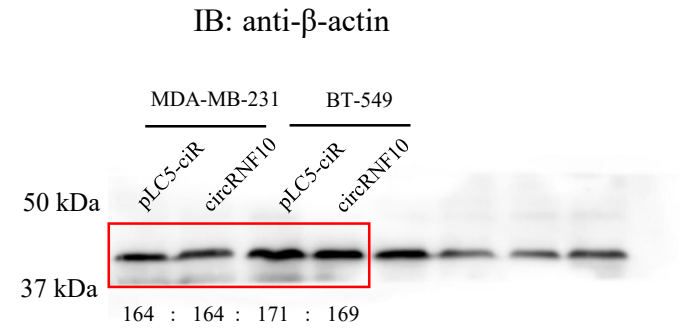

Uncropped western blot of Figure 6G.

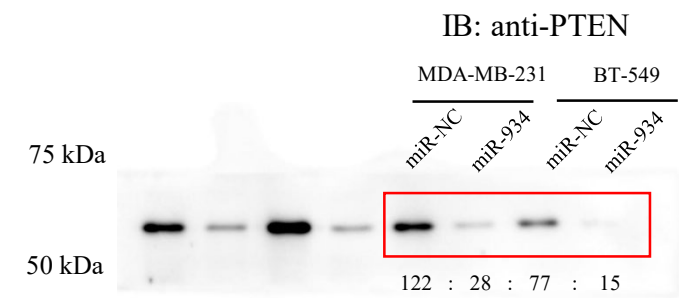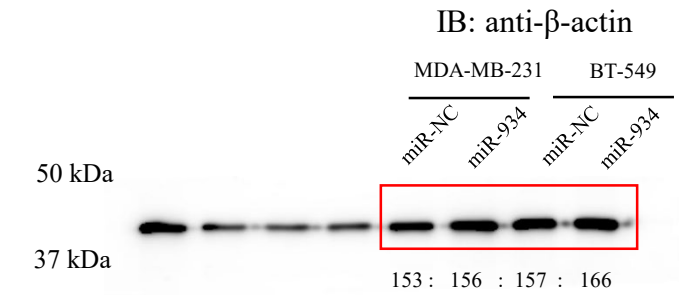

Uncropped western blot of Figure 6H.

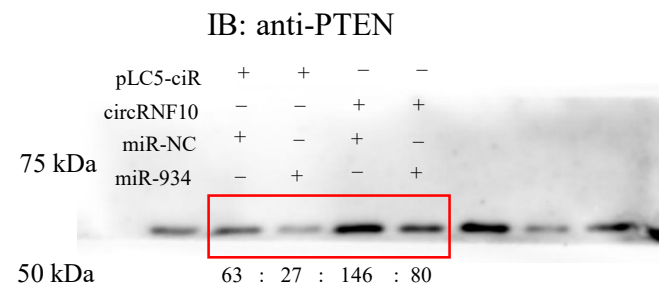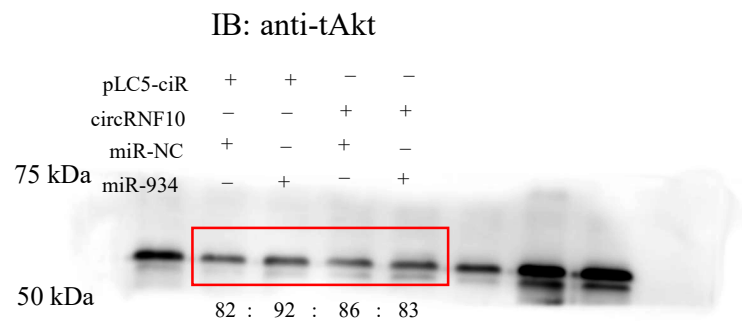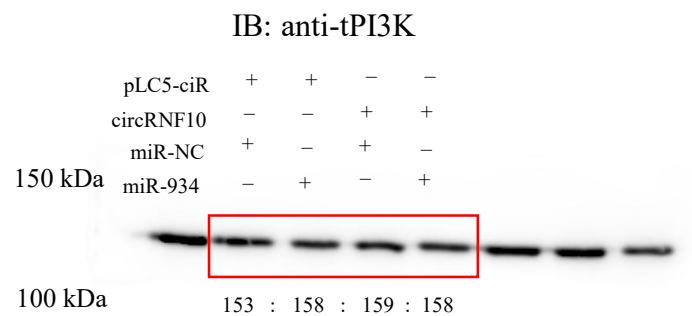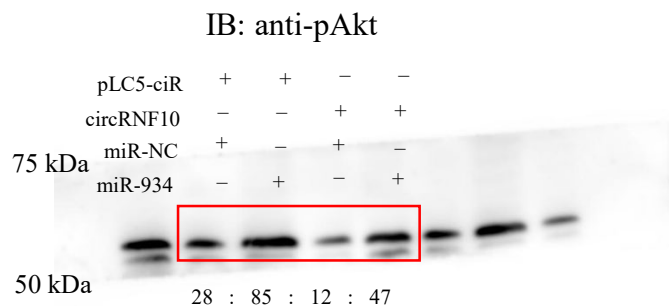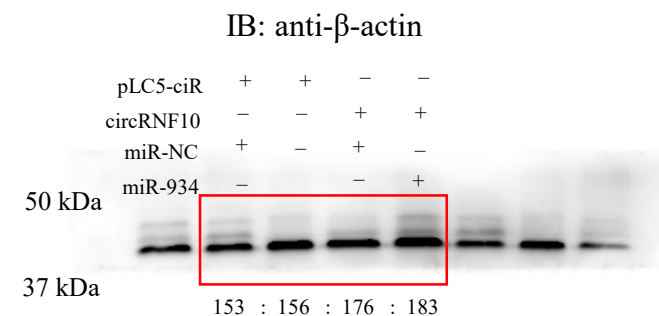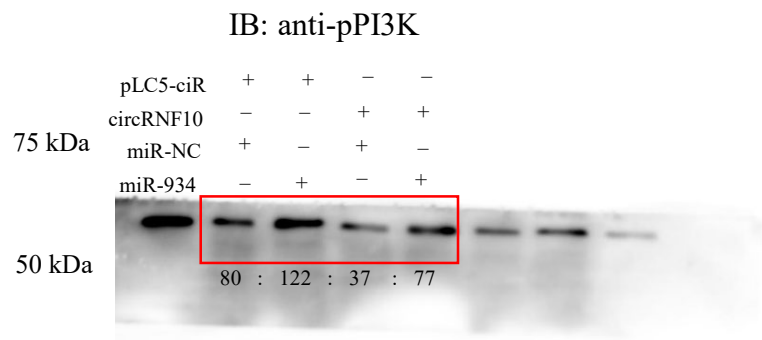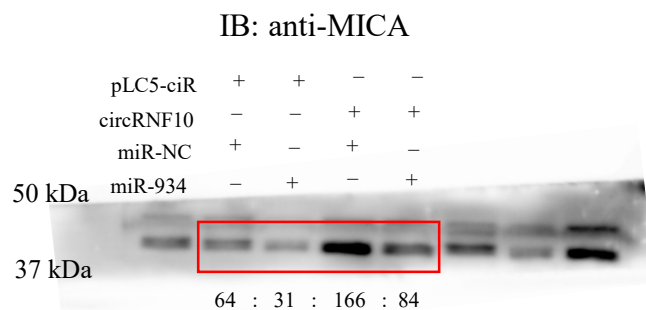

**Figure S1.** Uncropped western blot of Figure 7H.
