# Supplementary material for: circRNF10 Regulates Tumorigenic Properties and Natural Killer Cell-Mediated Cytotoxicity against Breast Cancer through the miR-934/PTEN/PI3k-Akt Axis
Source: MDPI journal article supplement (doi:10.3390/cancers14235862), 2022-11-28
Supplement: s1 [file s1]

**Supplementary Table S1 The primers used in the PCR amplification**

| <b>Genes</b>     | <b>Primers</b>                                                                                            |
|------------------|-----------------------------------------------------------------------------------------------------------|
| <b>circRNF10</b> | Forward, 5'-CCATTCATCTAGGAGCGCATT-3'<br>Reverse, 5'-GCAGTAGGTGGATAGAGGCATATT-3'                           |
| <b>RNF10</b>     | Forward, 5'-ACCCAAGAGCGATGGAAAGA-3'<br>Reverse, 5'-AACTGGGCAGGGCTAAACTC-3'                                |
| <b>GAPDH</b>     | Forward, 5'-CGCTGAGTACGTCGTGGAGTC-3'<br>Reverse, 5'-GCTGATGATCTTGAGGCTGTTGTC-3'                           |
| <b>U6</b>        | RT, 5'-AACGCTTCACGAATTTGCGT-3'<br>Forward, 5'-CTCGCTTCGGCAGCACA-3'<br>Reverse, 5'-AACGCTTCACGAATTTGCGT-3' |
